# Supplementary material
Source: PubMed Central journal article supplement (PMC7064430)
Supplement: NIHMS1539703-supplement-Revised_Supplemental_Material.pdf [file NIHMS1539703-supplement-Revised_Supplemental_Material.pdf]

1 **Table E1. Immunologic workup over time. (For Online Repository)**

2

|                                                              | <b>Normal</b>                                                                                                                       | <b>Abnormal</b>                                                                                                                                                                                                                 |
|--------------------------------------------------------------|-------------------------------------------------------------------------------------------------------------------------------------|---------------------------------------------------------------------------------------------------------------------------------------------------------------------------------------------------------------------------------|
| Initial workup during admission for CMV (3 mo)               | Ferritin<br>HIV PCR<br>Recent thymic emigrants                                                                                      | <i>Lymphocyte subsets:</i> low CD8+ (174), low B cells (365), low NK cells (15)<br>IgM (7), IgG (53), IgA (<7)                                                                                                                  |
| Extended workup (3 mo – 25 mo)                               | MHC I & MHC II, Zap 70<br>Mitogen stimulation (PHA & PWM)<br>Immunoglobulins normalized at 5 mo<br>B and T cells normalized at 9 mo | NK cell function low x 3 samples by 12 mo<br><i>Whole exome sequencing:</i> ZBTB24 mutation c.1492_1493del, p.Q498Vfs, homozygous (returned at age 25 mo)                                                                       |
| Prior to second presentation (32 mo)                         | Recent thymic emigrants<br>Tetanus and diphtheria titers<br>IgM (33), IgG (541), IgA (76)                                           | <i>B-cell panel:</i> decreased CD27+ IgM-/IgD- (2, 0.3%), decreased CD19+/CD5+ (286, 36%)<br><i>Lymphocyte subsets:</i> low NK cells (93)<br><i>Pneumococcal titers:</i> 0/14 protective                                        |
| Admission for EBV-driven lymphoproliferative disease (34 mo) | Mitogen stimulation (borderline-low response to PHA, but low viability of sample)<br>IgM (36), IgA (49)                             | <i>Lymphocyte subsets:</i> low CD4+ (671), low CD8+ (548), low B cells, low NK cells (48)<br><i>Pneumococcal titers:</i> 0/14 protective after PPSV23 (administered at 32 mo)<br>Low tetanus and diphtheria titers<br>IgG (362) |

3

4 Units: Immunoglobulins (mg/dL), cell frequencies (cells/mm<sup>3</sup>)

5

**A**

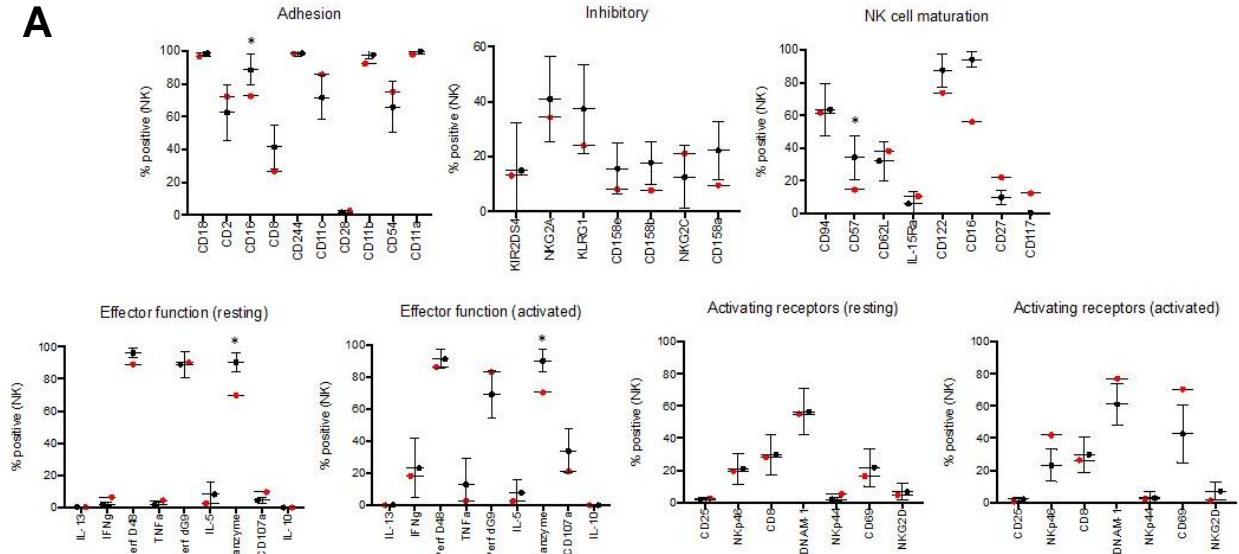

6

**B**

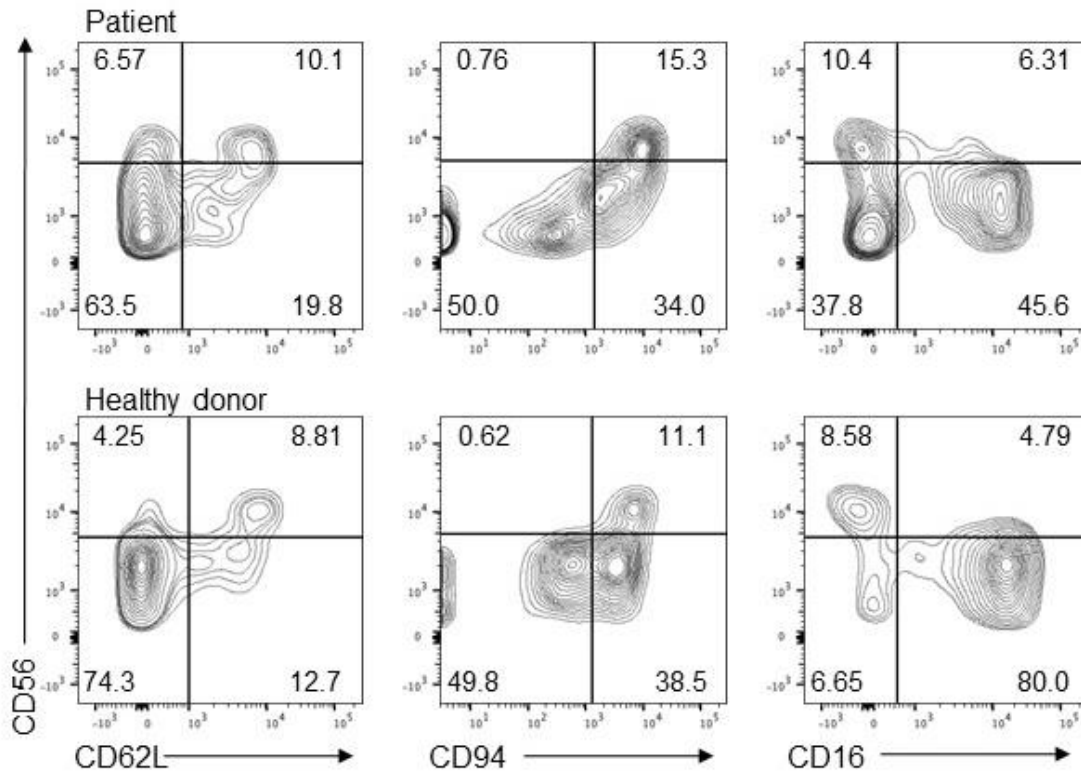

7

8 **Figure E1. High-resolution phenotyping of patient NK cells. (For Online Repository)**

9 PBMC from the patient were analyzed using the flow cytometry panels described in Methods. A) Frequency of NK cells positive for the parameter of interest were calculated for the patient and are shown (red symbol) with the average  $\pm$  SD of 45 pediatric healthy donors (black symbols). Markers associated with NK cell maturation that are out of normal ranges are marked with an asterisk. B) Representative plots showing the expression of markers associated with NK cell maturation and their expression on patient (top) and healthy donor NK cells (bottom).

10  
11  
12  
13  
14

15

## 16 **NK cell phenotyping**

17 Comprehensive NK cell phenotyping was performed to better understand the altered NK cell  
18 subsets observed in the patient. When the NK cell population was considered as a whole, the  
19 frequency of expression of markers associated with NK cell maturation, including CD16, CD57  
20 and granzyme B, were decreased when compared to the mean of 45 healthy pediatric donors  
21 (Supp Fig 1A). In addition, the expression of killer immunoglobulin-like receptors was at the low  
22 end of the normal range. Conversely, those receptors associated with an immature phenotype,  
23 such as CD117 and CD62L, had increased expression or expression at the high end of the normal  
24 range. Despite these changes, there were no other significant abnormalities detected in the  
25 expression of activating, inhibitory, or adhesion molecules on patient NK cells. While granzyme  
26 B, and to a certain extent perforin expression was low in the patient, IFN $\gamma$  was produced in  
27 response to activation at a level consistent with healthy controls (Supp Fig 1A). Taken together,  
28 these data suggest that the alteration in receptors identified by FACS analyses is a result of over-  
29 representation of a bona fide CD56<sup>bright</sup> subset. This was confirmed by further analyses that  
30 identified the appropriate distribution of maturation markers on CD56<sup>bright</sup> and CD56<sup>dim</sup> subsets  
31 respectively (Supp Fig 1B).

32

33 **METHODS**

34

35 **Human study approval**

36 All studies were performed in accordance with the Declaration of Helsinki with the written and  
37 informed consent of all participants under the guidance of the Institutional Review Boards of  
38 Baylor College of Medicine and Texas Children's Hospital. The patient's family gave their  
39 consent for their daughter's case to be formally described.

40 **Whole exome sequencing and analysis**

41 Whole exome sequencing was performed on genomic DNA as previously described<sup>E1</sup>.  
42 Bioinformatic analyses were performed as previously described using filters of an allelic  
43 frequency of less than 0.0005 in the BCMG, ESP5400, 1000 Genomes and ExAC databases.  
44 Variants were subsequently confirmed by Sanger sequencing using primers constructed by  
45 Primer3<sup>E2</sup>.

46 **Cell isolation and cell lines**

47 Primary peripheral blood mononuclear cells were isolated by Ficoll-Paque density  
48 centrifugation. K562 erythroleukemic target cells were maintained in complete RPMI media with  
49 10% FCS.

50 **<sup>51</sup>Cr cytotoxicity assay**

51 <sup>51</sup>Cr assays were performed as previously described.<sup>E3</sup> Briefly, 10<sup>4</sup> K562 target cells were  
52 labeled with 100 μCi of <sup>51</sup>Cr, washed, and subsequently incubated with PBMC from patient or  
53 healthy donor in the presence or absence of 1000 U/ml IL-2 (Roche). After 4 hours, plates were  
54 centrifuged and supernatant was transferred to a LUMA plate and dried overnight. Emission was  
55 read with a TopCount NXT and % specific lysis was calculated as follows: (sample – average

56 spontaneous release) / (average total release – average spontaneous release) x 100.

## 57 **Flow cytometry**

58 NK cell phenotyping panels were performed as described in Mahapatra et al.<sup>E4</sup> For panels which  
59 did not require stimulation, cells were immunostained with antibodies diluted in PBS-2% FBS  
60 for 20-25 minutes. For panels assessing effector function and activation, cells were stimulated  
61 with phorbol 12-myristate 13-acetate (10ng/ml, Sigma-Aldrich) and ionomycin (1 µg/ml, Sigma-  
62 Aldrich) for 4 hours at 37° C and unstimulated control cells were incubated in parallel. Brefeldin  
63 A (10 µg/ml, Sigma-Aldrich) and anti-CD107a were added at the beginning of incubation for  
64 both stimulated and unstimulated cells for detection of intracellular cytokines. Cells were then  
65 permeabilized with BD Cytotfix/Cytoperm (BD Biosciences), followed by antibody staining for  
66 45-60 minutes in BD Fix/Perm buffer. Activated cells were stained for surface markers for 20-25  
67 minutes following the 4-hour incubation. Data were acquired on a modified LSR Fortessa (BD  
68 Biosciences) with the capacity to detect 18 fluorescent parameters and exported to FlowJo 10.5.3  
69 (TreeStar) for analysis. Frequency of cells positive for each parameter were compared to the  
70 average and standard deviation of 45 healthy donor pediatric samples ages 5-20 years.<sup>E4</sup> Data  
71 showing comparisons was visualized with Prism 6.0 (GraphPad Software).

## 72 SUPPLEMENTAL REFERENCES

- 73 E1. Lupski JR, Gonzaga-Jauregui C, Yang Y, Bainbridge MN, Jhangiani S, Buhay CJ, et al. Exome sequencing  
74 resolves apparent incidental findings and reveals further complexity of SH3TC2 variant alleles causing Charcot-  
75 Marie-Tooth neuropathy. *Genome Med.* 2013 Jun 27;5(6):57.
- 76 E2. Untergasser A, Cutcutache I, Koressaar T, Ye J, Faircloth BC, Remm M, et al. Primer3--new capabilities and  
77 interfaces. *Nucleic Acids Res.* 2012 Aug;40(15):e115.
- 78 E3. Orange JS, Ramesh N, Remold-O'Donnell E, Sasahara Y, Koopman L, Byrne M, et al. Wiskott-Aldrich  
79 syndrome protein is required for NK cell cytotoxicity and colocalizes with actin to NK cell-activating  
80 immunologic synapses. *Proc Natl Acad Sci U S A.* 2002 Aug 20;99(17):11351-6.
- 81 E4. Mahapatra S, Mace EM, Minard CG, Forbes LR, Vargas-Hernandez A, Duryea TK, et al. High-resolution  
82 phenotyping identifies NK cell subsets that distinguish healthy children from adults. *PLoS One.* 2017 Aug  
83 2;12(8):e0181134.

84

85

86
